# Supplementary material for: BMP4 promotes hepatocellular carcinoma proliferation by autophagy activation through JNK1-mediated Bcl-2 phosphorylation
Source: PubMed Central journal article supplement (PMC6048721; doi:10.1186/s13046-018-0828-x), 2018-07-16
Supplement: 13046_2018_828_MOESM1_ESM.pdf [file 13046_2018_828_MOESM1_ESM.pdf]

**DOI: 10.1007/s12248-017-0100-0**  
**LPMB/Oncol Rep 2017;34(1):1-6**

Ling Yin<sup>1,2</sup>, Ying Han<sup>1,2</sup>, Yiyi Li<sup>1,2</sup>, Changjing Cai<sup>1,2</sup>, Yaojie Fu<sup>1,2</sup>, Hong Shen<sup>1,2,3,\*</sup>

Authors' affiliations:

1 Department of Oncology, 2 National Clinical Research Center for Geriatric Disorders,  
3 Key Laboratory for Molecular Radiation Oncology of Hunan Province,  
Xiangya Hospital, Central South University, Changsha, Hunan, China 410008

\* Address reprint requests to: Dr. Hong Shen,  
Institute of Medical Sciences, Xiangya Hospital,  
Central South University, Changsha, Hunan, China 410008.  
Tel: (86) 731-8432-7633  
E-mail: hongshen2000@csu.edu.cn

Supplementary Information include:  
Supplementary Figure S1-S3 and supplementary Table S1-S2.

# Figure S1

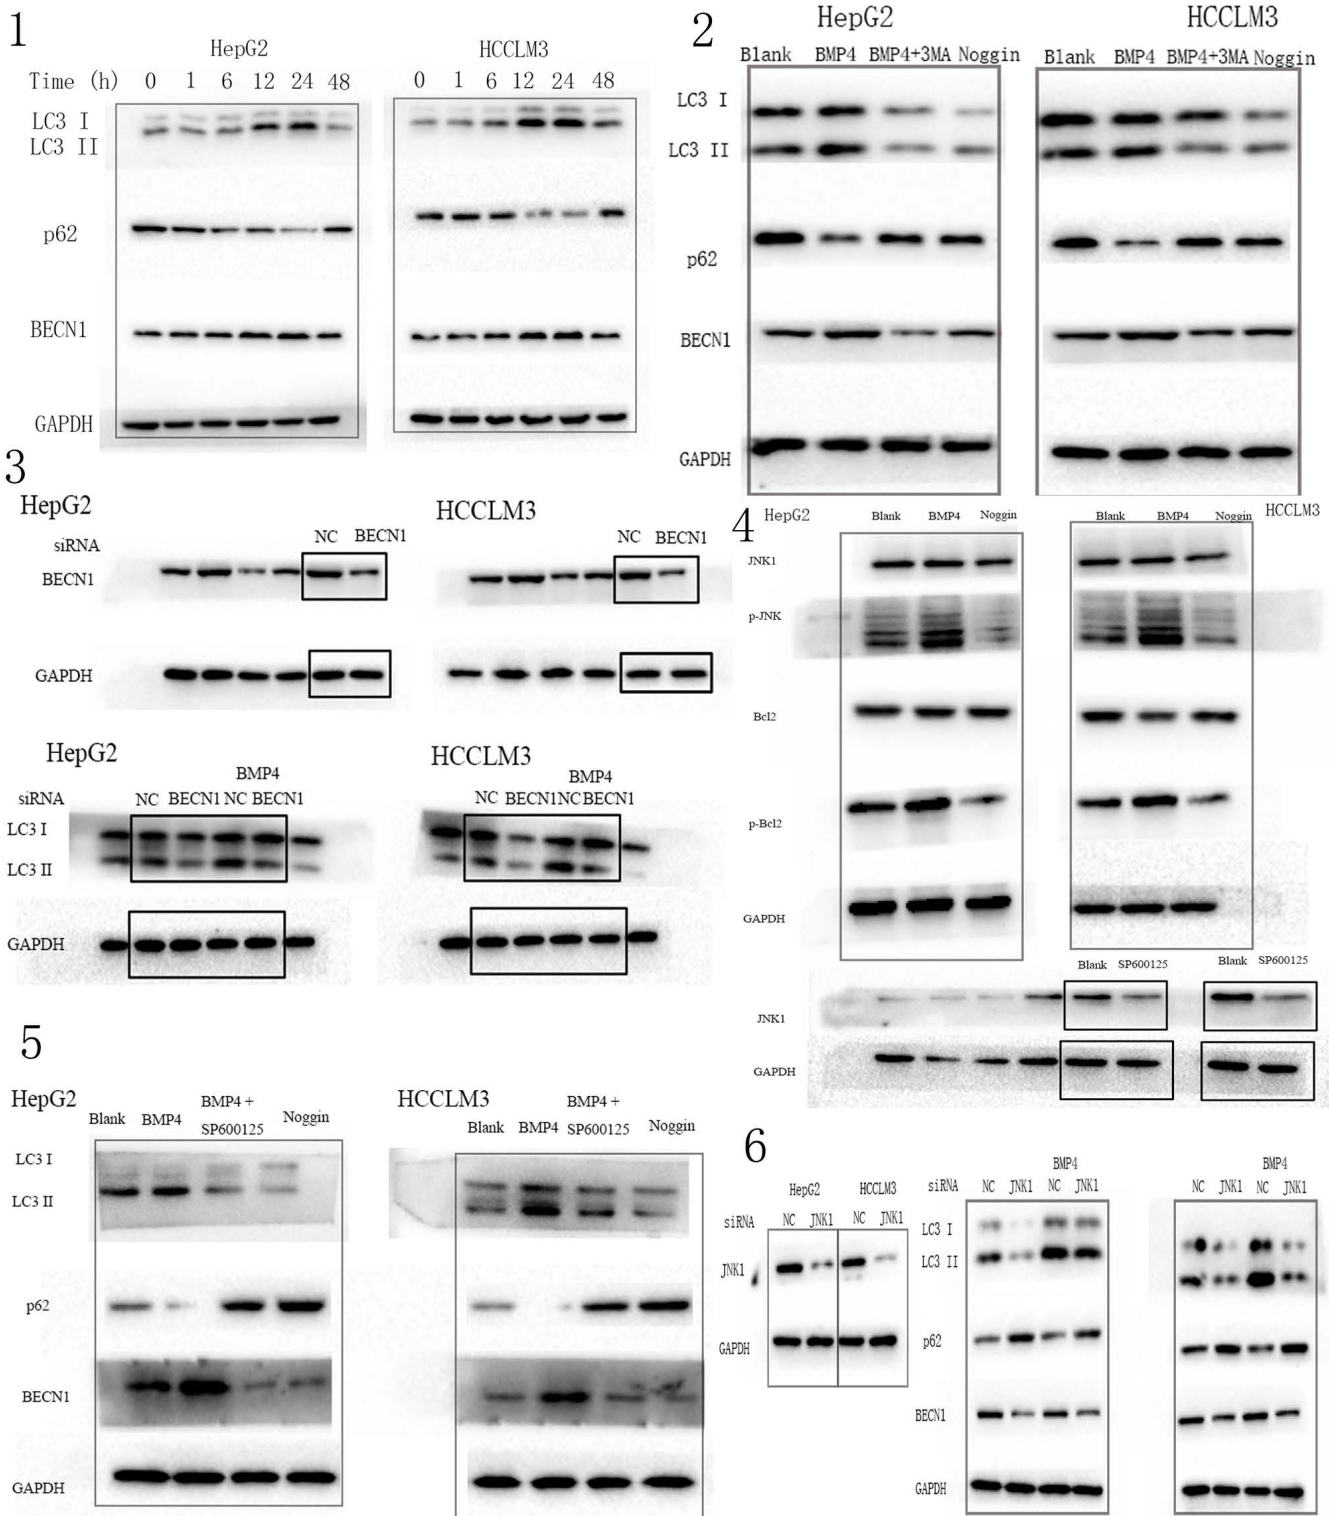

Figure S1: Original blots of Western blot. (1) Original blots of Figure 1. (2) Original blots of Figure 2. (3) Original blots of Figure 3. (4) Original blots of Figure 4. (5) Original blots of Figure 5. (6) Original blots of Figure 6.

## Figure S2

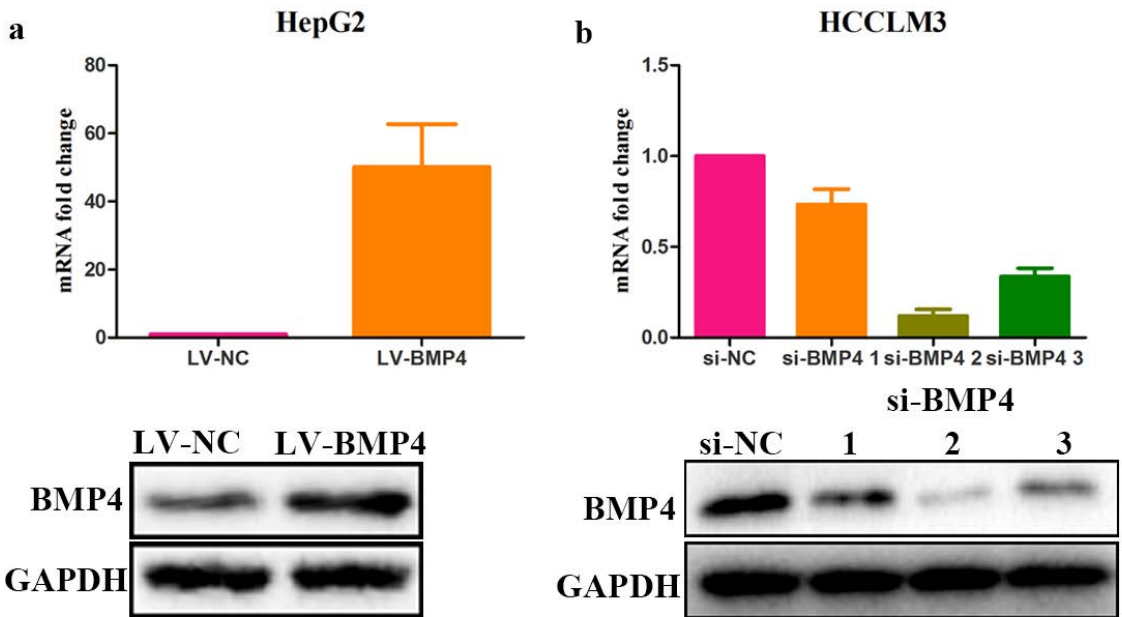

Figure S2: The efficiency of BMP4 expression manipulated by lentivirus. (a) The efficiency of BMP4 overexpression in HepG2 cells was confirmed by qRT-PCR and Western blot. (b) The efficiency of BMP4 knockdown in HCCLM3 cells was confirmed by qRT-PCR and Western blot.

## Figure S3

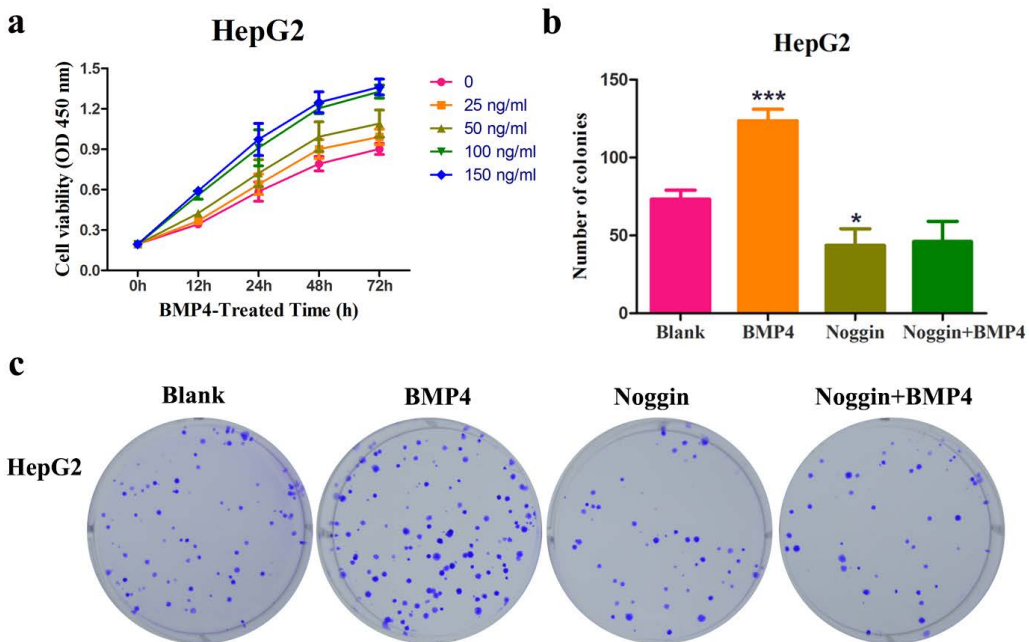

Figure S3: BMP4 promoted HepG2 cells growth: (a) HepG2 cells were treated with various concentrations of human recombinant BMP4 (0, 25, 50, 100 and 150 ng/mL) for different lengths of time to assay the effects on HCC cells proliferation. Cell viability was determined by CCK-8 assays. (b) & (c) Effects of BMP4 or Noggin on long term colony formation in HepG2 cells. The numbers of colonies in the BMP4-treated (100 ng/mL) groups were significantly more than that in the blank groups in HepG2 cells ( $p < 0.001$ ), while Noggin-treated (200 ng/mL) groups displayed significantly less colony numbers than the blank control groups ( $p < 0.05$ ).  $n=3$ , one-way ANOVA with post-hoc Tukey's test.

**Supplementary Table S1. Information of antibodies for western blot.**

---

| <b>Antibody</b>      | <b>Working Dilution</b> | <b>Molecular Weight (KDa)</b> | <b>Cat. Number</b> |
|----------------------|-------------------------|-------------------------------|--------------------|
| BMP4                 | 1:5000                  | 47                            | ab124715           |
| LC3                  | 1:1000                  | 14, 16                        | #4108              |
| SQSTM1/p62           | 1:1000                  | 62                            | ab56416            |
| Beclin1              | 1:1000                  | 60                            | ab207612           |
| JNK1                 | 1:1000                  | 48                            | ab213521           |
| phospho-JNK          | 1:1000                  | 46, 54                        | #4668              |
| Bcl-2                | 1:1000                  | 26                            | #4223              |
| phospho-Bcl2         | 1:1000                  | 28                            | #2827              |
| GAPDH                | 1:10000                 | 36                            | ab181602           |
| Goat anti-Mouse IgG  | 1:5000                  | —                             | ab6789             |
| Goat anti-Rabbit IgG | 1:5000                  | —                             | ab6721             |

---

**Supplementary Table S2. The sequences of siRNA targeting BMP4.**

| <b>No.</b>      | <b>sequences</b>                   | <b>titer</b> |
|-----------------|------------------------------------|--------------|
| BMP4-RNAi1 - 5' | taaGCAGCCAAACTATGGGCTA             | 5E+8         |
| BMP4-RNAi1 - 3' | ctcgagTAGCCCATAGTTTGGCTGCtttttttc  |              |
| BMP4-RNAi1 - 5' | tcgagaaaaaaaaGCAGCCAAACTATGGGCTA   | 5E+8         |
| BMP4-RNAi1 - 3' | ctcgagTAGCCCATAGTTTGGCTGCtta       |              |
| BMP4-RNAi2 - 5' | tgaCCCTGGTCAATTCTGTCAA             | 4E+8         |
| BMP4-RNAi2 - 3' | ctcgagTTGACAGAATTGACCAGGGtcttttttc |              |
| BMP4-RNAi2 - 5' | tcgagaaaaaagaCCCTGGTCAATTCTGTCAA   | 4E+8         |
| BMP4-RNAi2 - 3' | ctcgagTTGACAGAATTGACCAGGGtca       |              |
| BMP4-RNAi3 - 5' | tcaCCTCAACTCAACCAACCAT             | 5E+8         |
| BMP4-RNAi3 - 3' | ctcgagATGGTTGGTTGAGTTGAGGtgtttttc  |              |
| BMP4-RNAi3 - 5' | tcgagaaaaaacaCCTCAACTCAACCAACCAT   | 5E+8         |
| BMP4-RNAi3 - 3' | ctcgagATGGTTGGTTGAGTTGAGGtga       |              |
| BMP4-RNAi4 - 5' | tcaGATCCACAGCACTGGTCTT             | 3E+8         |
| BMP4-RNAi4 - 3' | ctcgagAAGACCAGTGCTGTGGATCtgtttttc  |              |
| BMP4-RNAi4 - 5' | tcgagaaaaaacaGATCCACAGCACTGGTCTT   | 3E+8         |
| BMP4-RNAi4 - 3' | ctcgagAAGACCAGTGCTGTGGATCtga       |              |
